# Supplementary material for: Butylidenephthalide Abrogates the Snail-Induced Cancer Stemness in Oral Carcinomas
Source: MDPI journal article supplement (doi:10.3390/ijms23116157), 2022-05-31
Supplement: s1 [file s1]

Supplementary Table S1. Case description and the characterization of oral cancer patients tissue samples

| <b>Case</b> | <b>Age/sex</b> | <b>Initial stage</b> | <b>ALDH+CD44+ (%)</b> | <b>Spheres formation</b> |
|-------------|----------------|----------------------|-----------------------|--------------------------|
| 1           | 60/M           | pT3N2bM0             | 23.4                  | Yes                      |
| 2           | 55/M           | pT4N2bM0             | 13.3                  | Yes                      |
